# Supplementary material for: Molecular predictors of response to pembrolizumab in thymic carcinoma
Source: PubMed Central journal article supplement — Cell Rep Med. 2021 Sep 3;2(9):100392. doi: 10.1016/j.xcrm.2021.100392 (PMC8484507; doi:10.1016/j.xcrm.2021.100392), 2021-09-03
Supplement: mmc1.pdf [file mmc1.pdf]

**Cell Reports Medicine, Volume 2**

**Supplemental information**

**Molecular predictors of response  
to pembrolizumab in thymic carcinoma**

**Yongfeng He, Archana Ramesh, Yuriy Gusev, Krithika Bhuvaneshwar, and Giuseppe Giaccone**

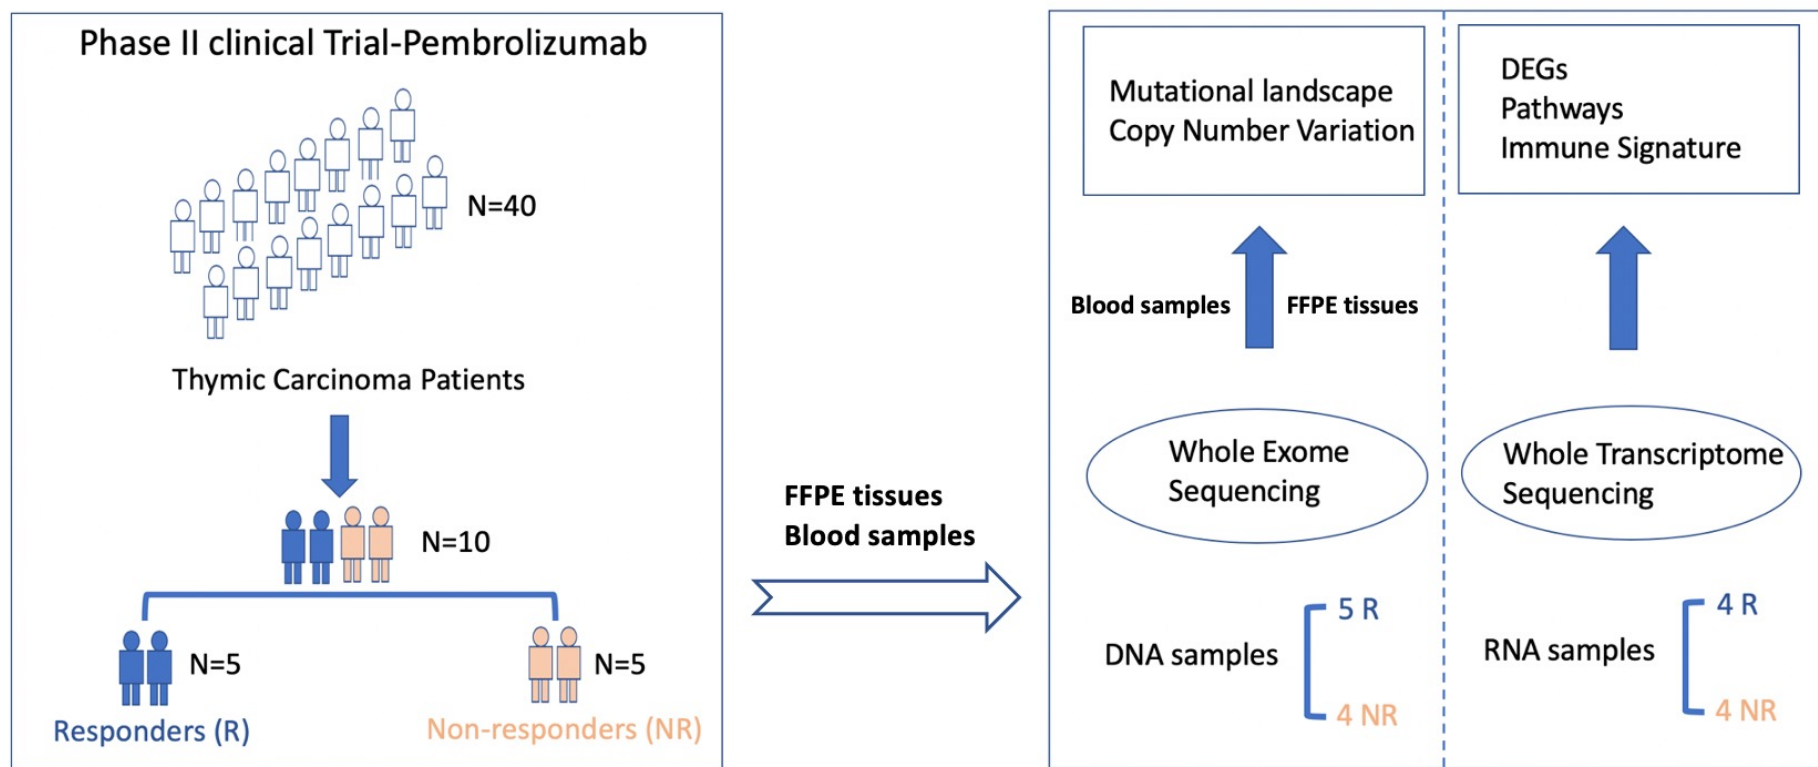

**Figure S1. Scheme showing the experimental design.** Related to Figure 1. 10 patient samples (5 responders and 5 non-responders) were selected from a single-arm single center phase 2 study of pembrolizumab in patients with recurrent thymic carcinoma. The selection of non-responders was also based on patients who either had progressive disease or short stable disease as best response. Tumor DNA and RNA samples were extracted from formalin-fixed-paraffin-embedded (FFPE) tissue blocks. Control DNAs were extracted from paired patients' peripheral blood samples. The samples that passed quality control were used for whole exome sequencing and whole transcriptome (RNA) sequencing. DNA samples: 5 responders vs 4 non-responders; RNA samples: 4 responders vs 4 non-responders.

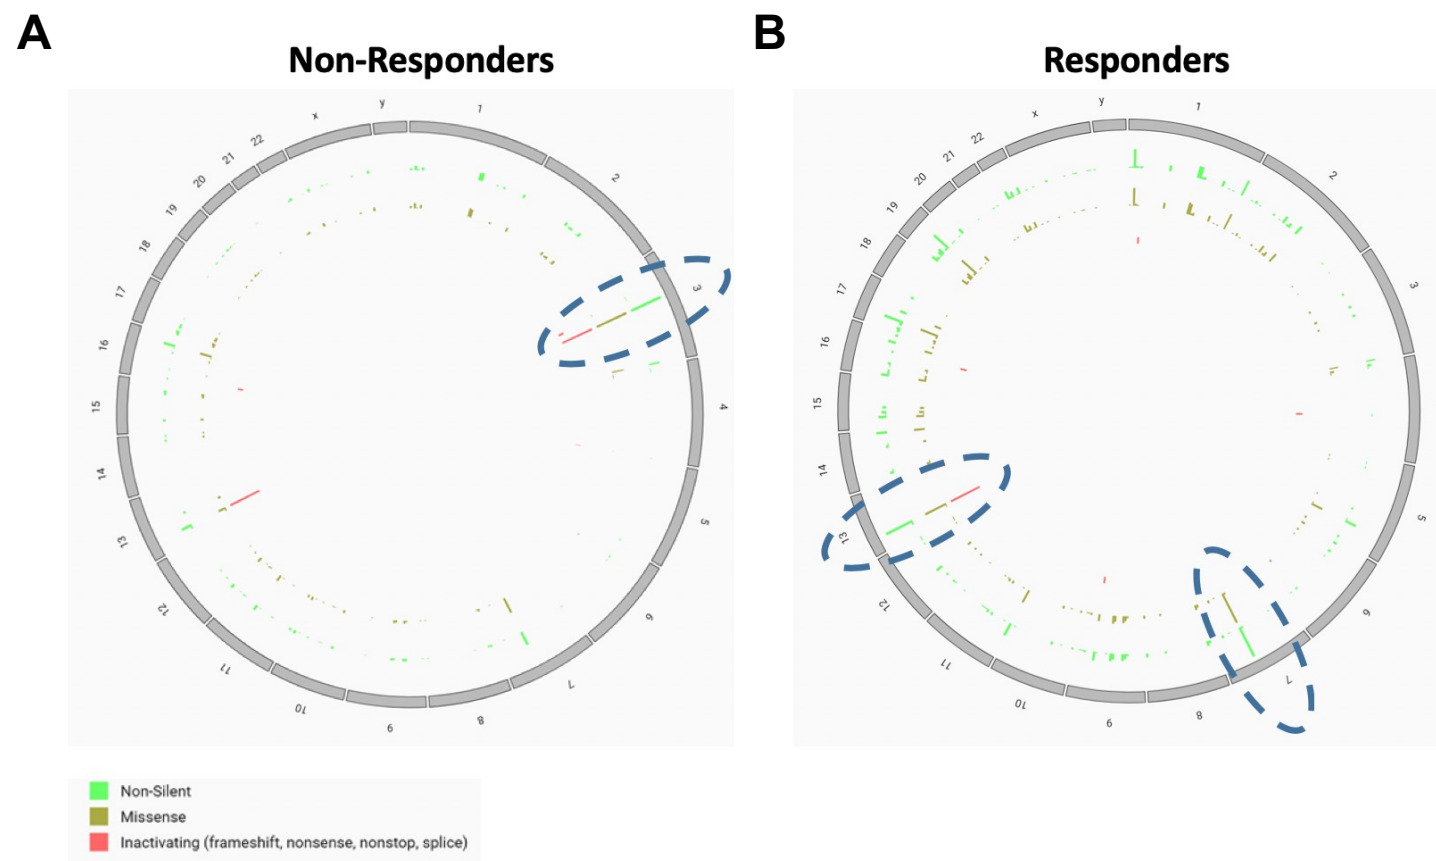

**Figure S2. Circos plot showing distribution of mutations across the genome.** Related to Figure 1. The Circos plot was generated by Cancer-Related Analysis of Variants Toolkit (CRAVAT).

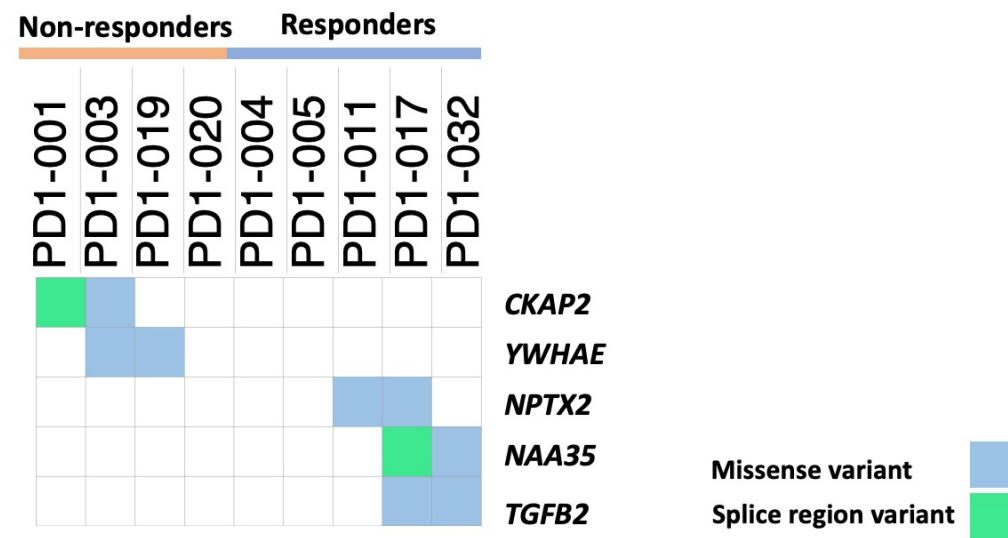

**Figure S3. Summary of recurrently mutated genes with unknown significance in the non-responders and responders.** Related to Figure 2. Recurrently mutated genes in the non-responders include *CKAP2* and *YWHAE*. Recurrently mutated genes in the responders are *NPTX2*, *NAA35* and *TGFB2*.

**A**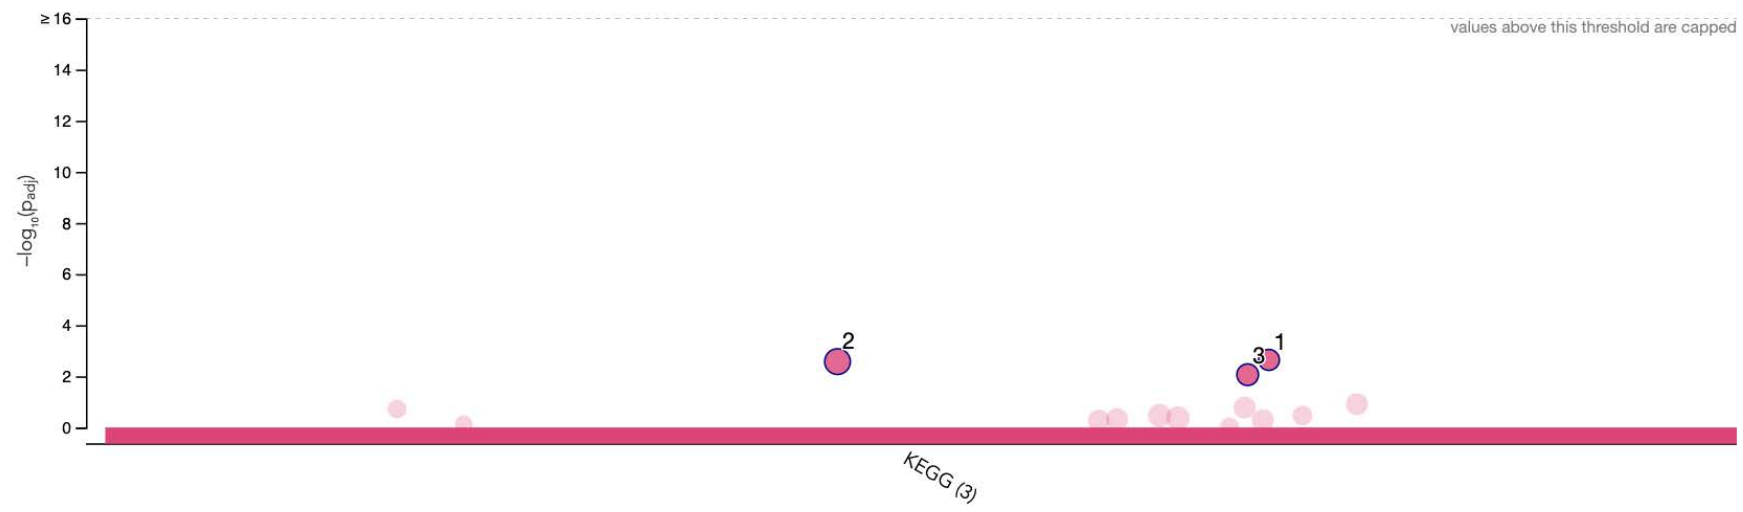

| ID | Source | Term ID    | Term Name                               | Padj (query_1)         |
|----|--------|------------|-----------------------------------------|------------------------|
| 1  | KEGG   | KEGG:04978 | Mineral absorption                      | $2.278 \times 10^{-3}$ |
| 2  | KEGG   | KEGG:04080 | Neuroactive ligand-receptor interaction | $2.659 \times 10^{-3}$ |
| 3  | KEGG   | KEGG:04971 | Gastric acid secretion                  | $8.628 \times 10^{-3}$ |

**B**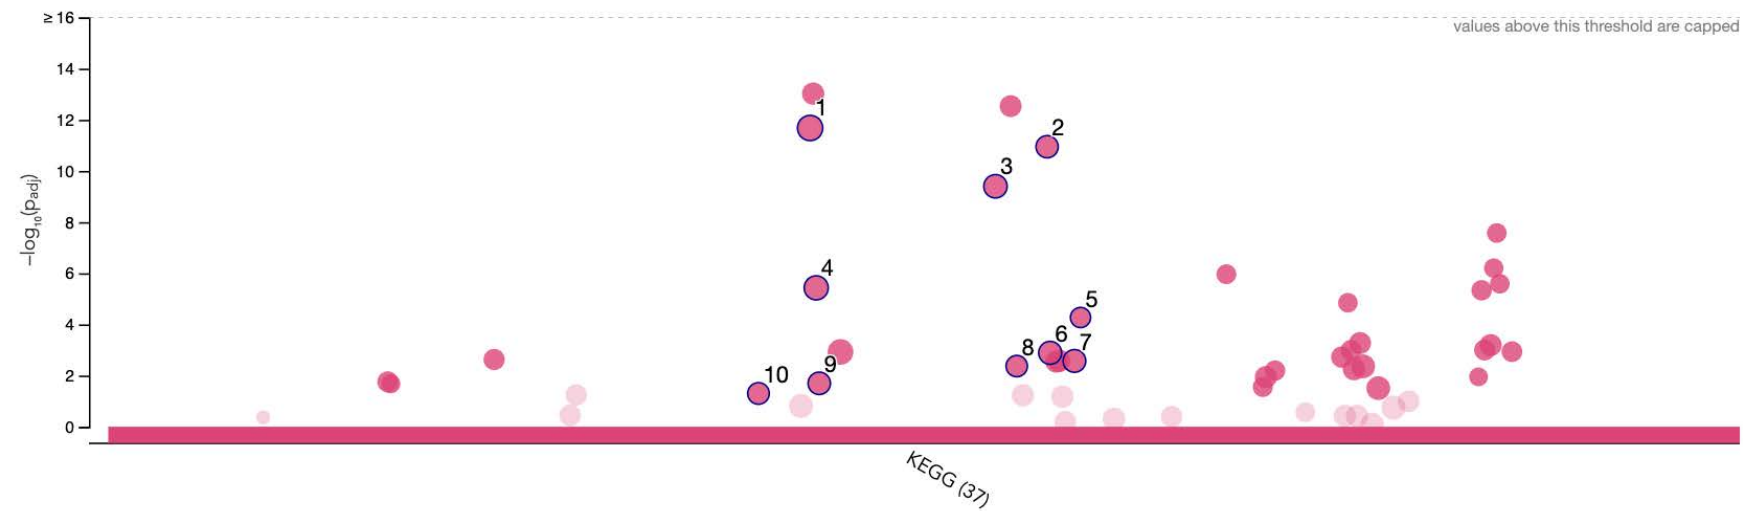

| ↑  | Source | Term ID    | Term Name                                    | Padj (query_1)          |
|----|--------|------------|----------------------------------------------|-------------------------|
| 1  | KEGG   | KEGG:04060 | Cytokine-cytokine receptor interaction       | $2.094 \times 10^{-12}$ |
| 2  | KEGG   | KEGG:04640 | Hematopoietic cell lineage                   | $1.128 \times 10^{-11}$ |
| 3  | KEGG   | KEGG:04514 | Cell adhesion molecules (CAMs)               | $3.973 \times 10^{-10}$ |
| 4  | KEGG   | KEGG:04062 | Chemokine signaling pathway                  | $3.721 \times 10^{-6}$  |
| 5  | KEGG   | KEGG:04672 | Intestinal immune network for IgA production | $5.369 \times 10^{-5}$  |
| 6  | KEGG   | KEGG:04650 | Natural killer cell mediated cytotoxicity    | $1.292 \times 10^{-3}$  |
| 7  | KEGG   | KEGG:04668 | TNF signaling pathway                        | $2.679 \times 10^{-3}$  |
| 8  | KEGG   | KEGG:04612 | Antigen processing and presentation          | $4.261 \times 10^{-3}$  |
| 9  | KEGG   | KEGG:04064 | NF-kappa B signaling pathway                 | $2.007 \times 10^{-2}$  |
| 10 | KEGG   | KEGG:03320 | PPAR signaling pathway                       | $4.999 \times 10^{-2}$  |

**Figure S4. Pathway analyses with KEGG database using gProfiler.** Related to Figure 3. **A.** Enriched pathways in upregulated DEGs of the non-responders vs the responders. **B.** Enriched pathways in downregulated DEGs of the non-responders vs the responders. The pathways related to immune response and tumorigenesis are highlighted.

**A****KEGG**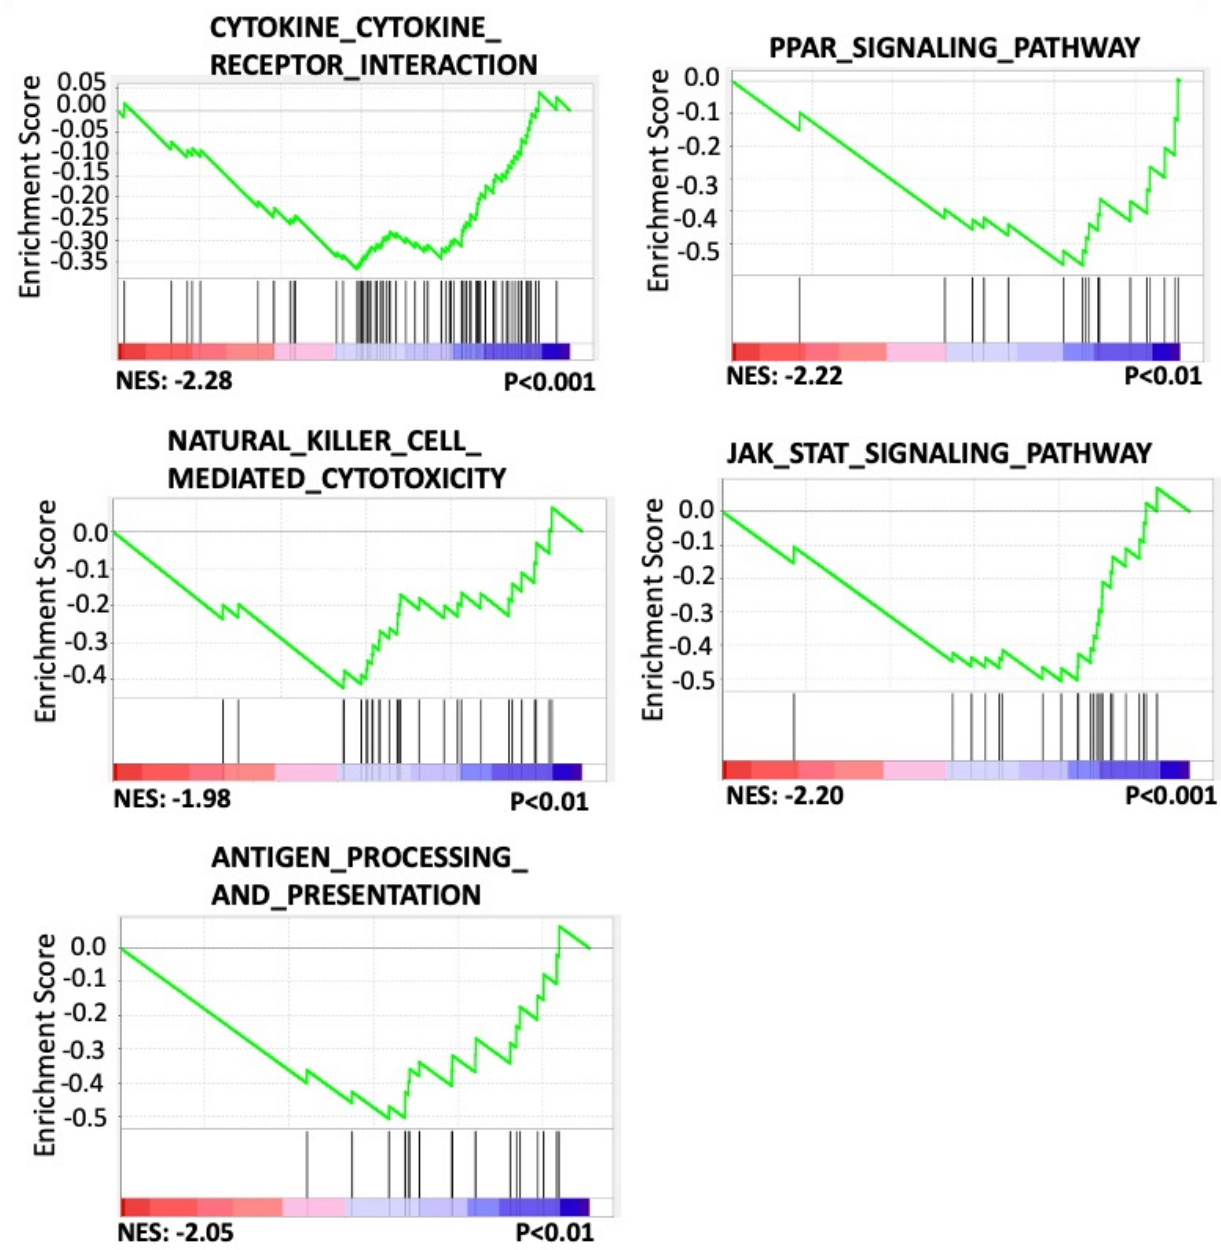**B****HALLMARK**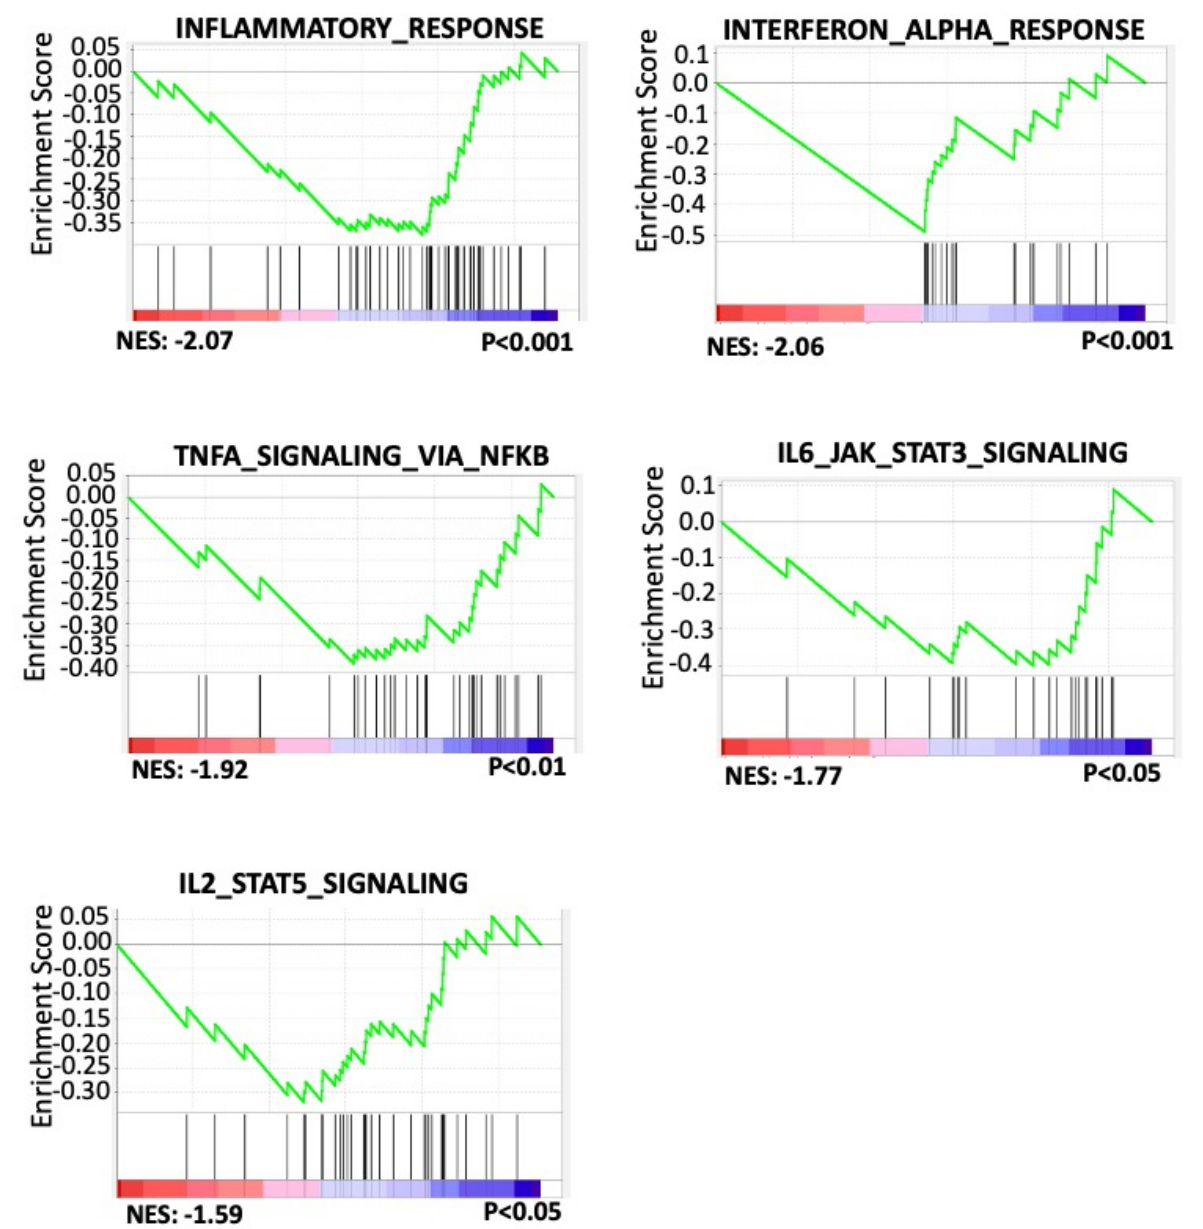

Figure S5. GSEA plots showing negative enrichment of KEGG and Hallmark pathways in pre-ranked DEGs of the non-responders vs the responders. Related to Figure 3. A. GSEA plots of enriched KEGG pathways. B. GSEA plots of enriched Hallmark pathways.



**A****Cytokine-cytokine receptor interaction**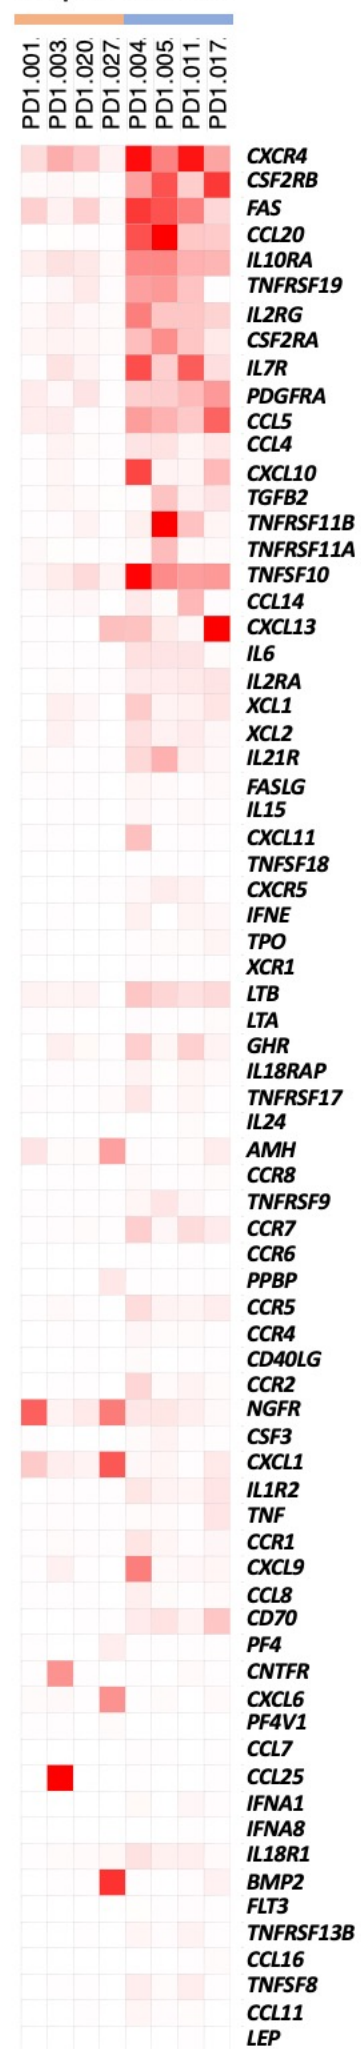**B****Natural killer cell mediated cytotoxicity**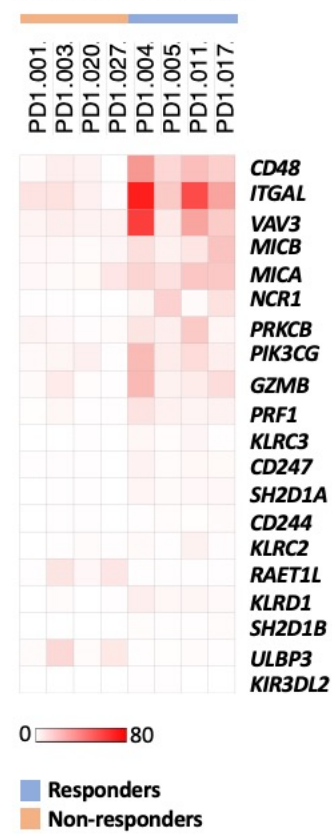

**Figure S6. Heatmap of DEGs involved in the indicated pathways.** Related to Figure 3. **A.** Heatmap of DEGs involved in cytokine-cytokine receptor interaction. **B.** Heatmap of DEGs involved in Natural killer cell mediated cytotoxicity.



### The Non-responder

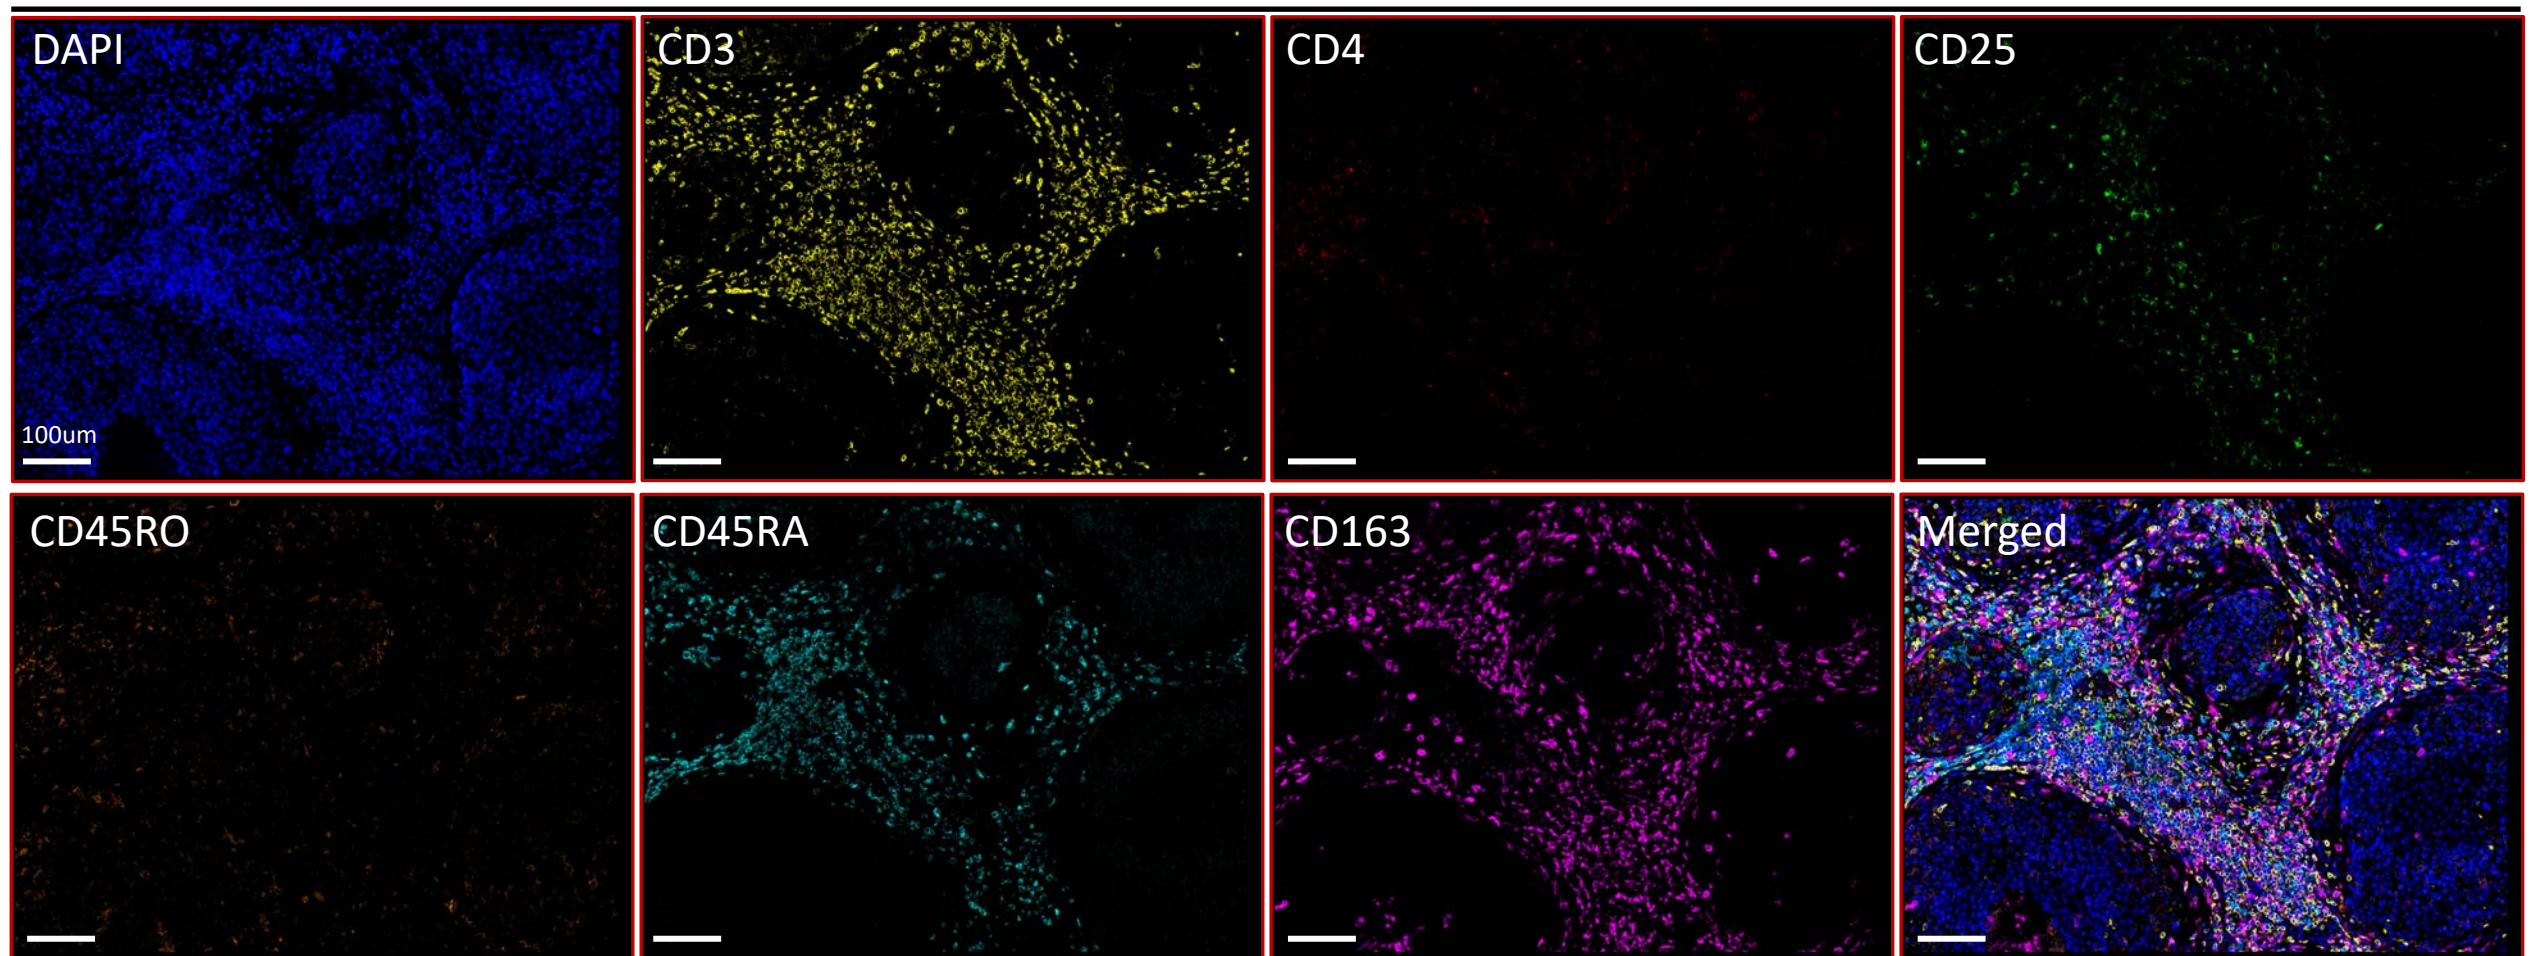

### The responder

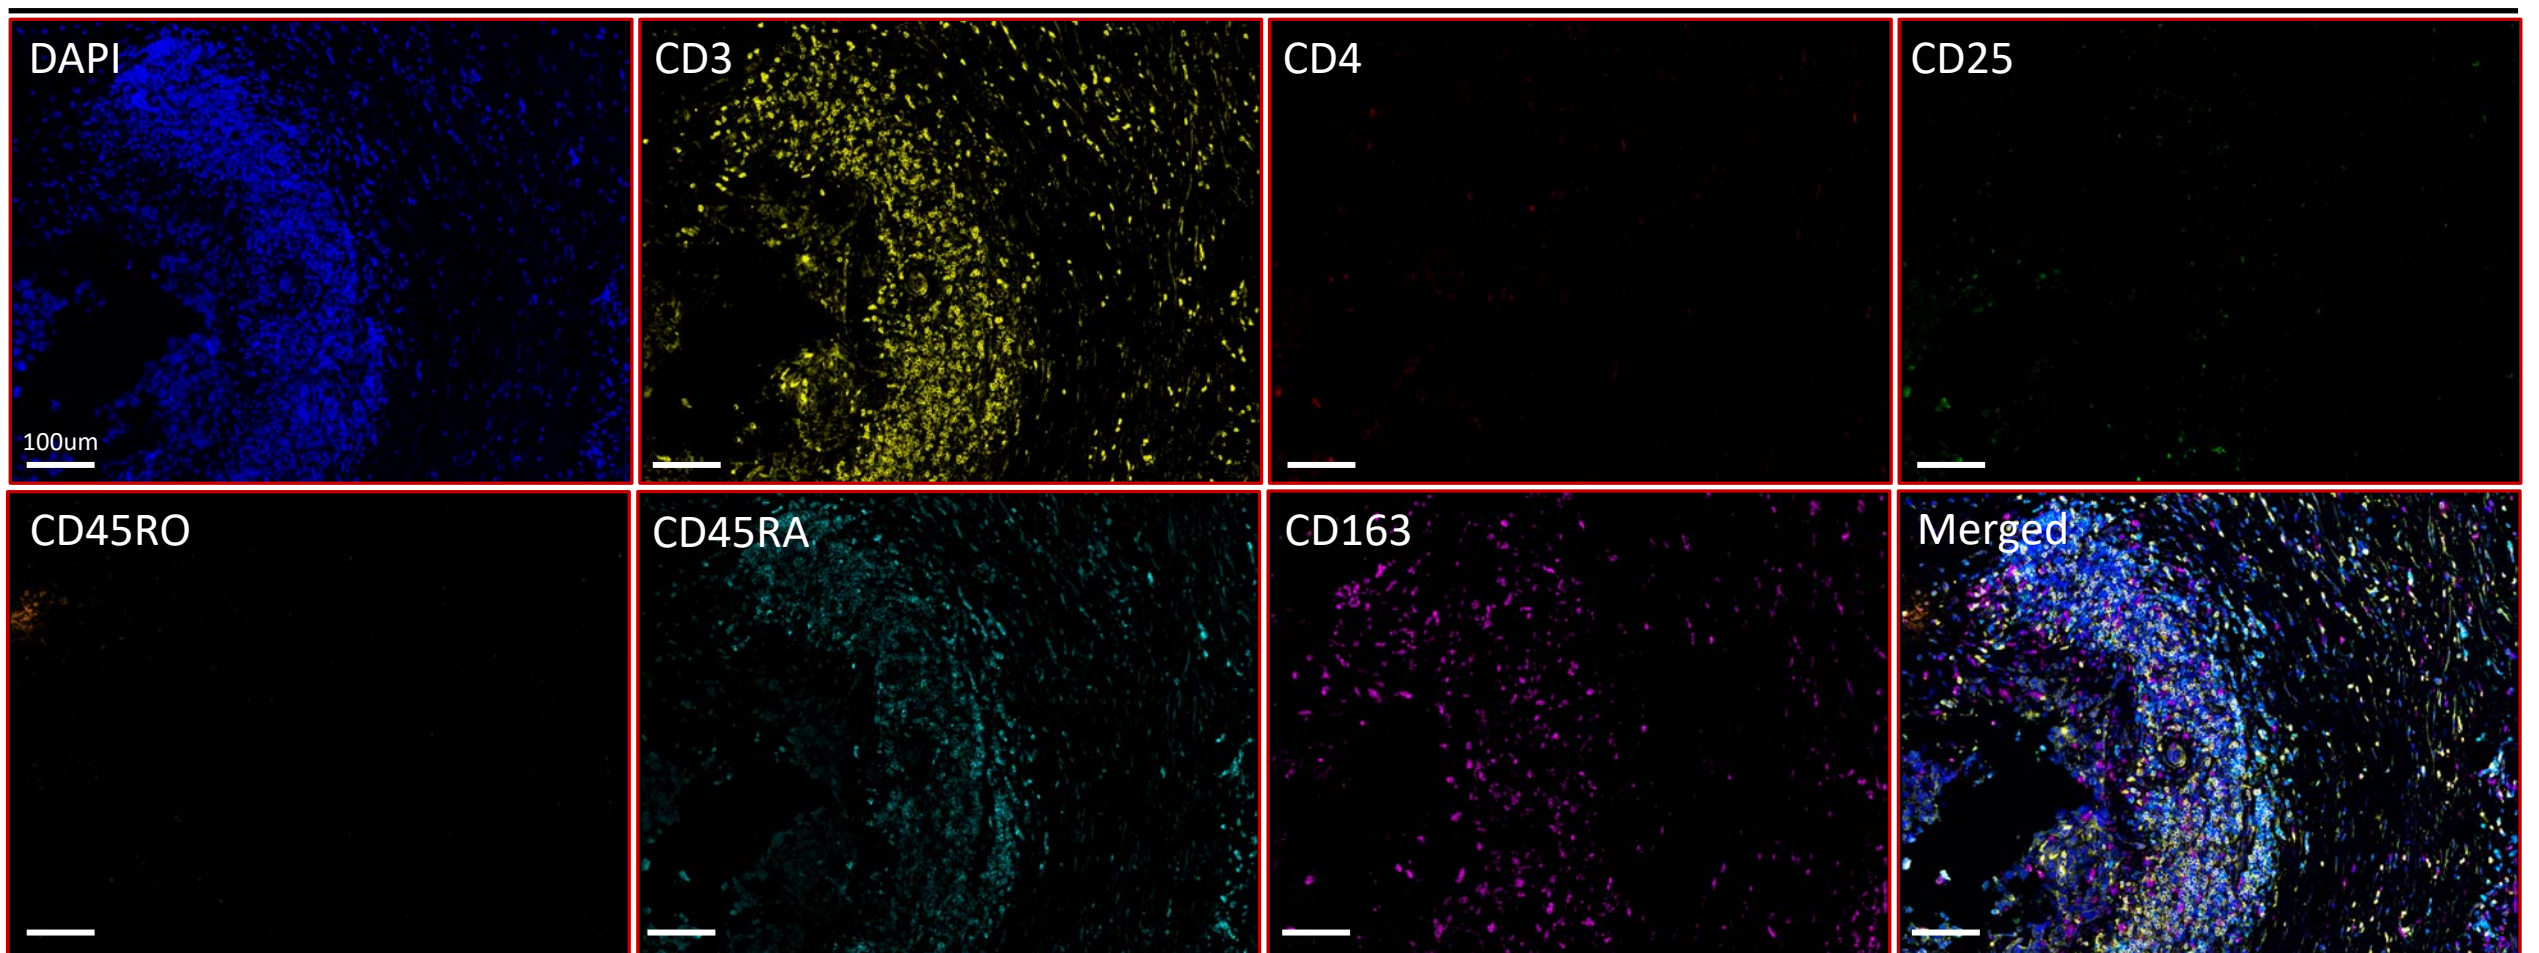

**Figure S7. Representative images showing different types of immune cells in thymic carcinoma tissues from the non-responder and the responder.** Related to Figure 4. Multiplex immunofluorescent staining was performed with CD3, CD4, CD25, CD45RO, CD45RA and CD163 antibodies, as indicated in the images.
